# Supplementary material for: Thermal and mechanical stability of lanthanide-containing glass–ceramic sealants for solid oxide fuel cells
Source: Royal Society of Chemistry journal article supplement (doi:10.1039/c3ta13196c), 2013-11-22
Supplement: c3ta13196c.pdf [file c3ta13196c.pdf]

## **Thermal and mechanical stability of lanthanide-containing glass-ceramic sealants for solid oxide fuel cells**

Allu Amarnath Reddy,<sup>a</sup> Ashutosh Goel<sup>b\*</sup>, Dilshat U. Tulyaganov,<sup>a,c</sup> Mariana Sardo<sup>d</sup>, Luis Mafra<sup>d</sup>, Maria J. Pascual<sup>e</sup>, Vladislav V. Kharton,<sup>a,f</sup> Ekaterina V. Tsipis,<sup>a,g</sup> Vladislav A. Kolotygin,<sup>a</sup> and José M. F. Ferreira,<sup>a\*</sup>

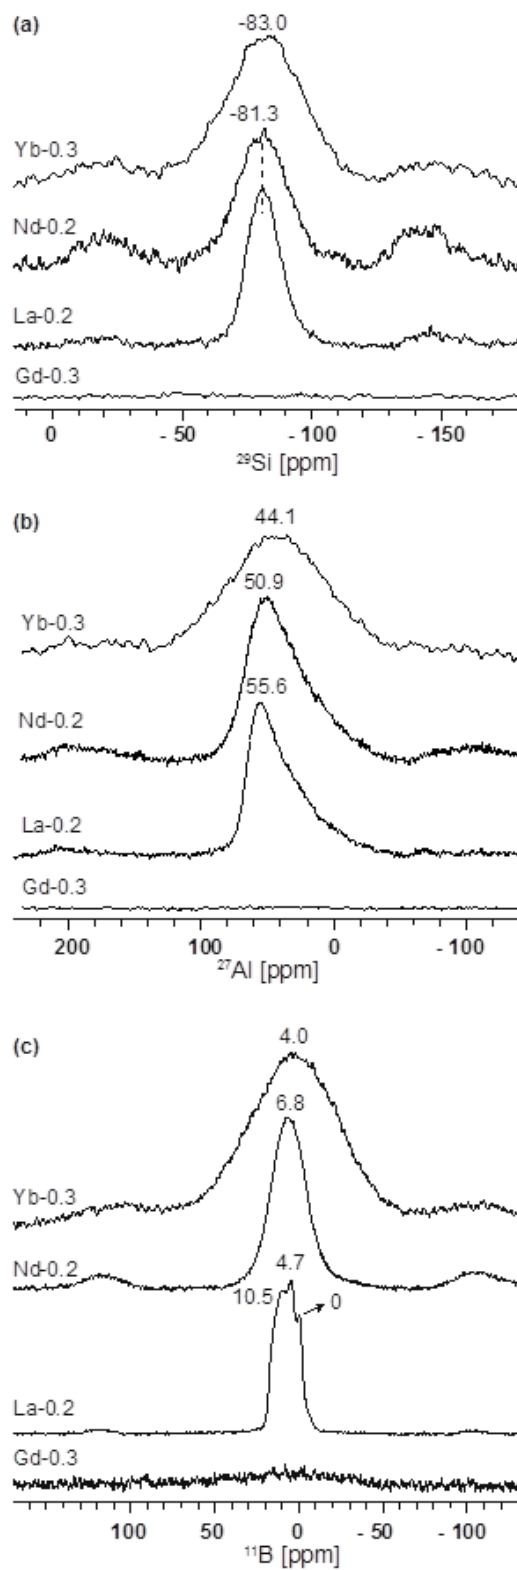

**Fig. S1** MAS NMR spectra of (a)  $^{29}\text{Si}$ , (b)  $^{27}\text{Al}$  and (c)  $^{11}\text{B}$  nuclides for the glass powders.

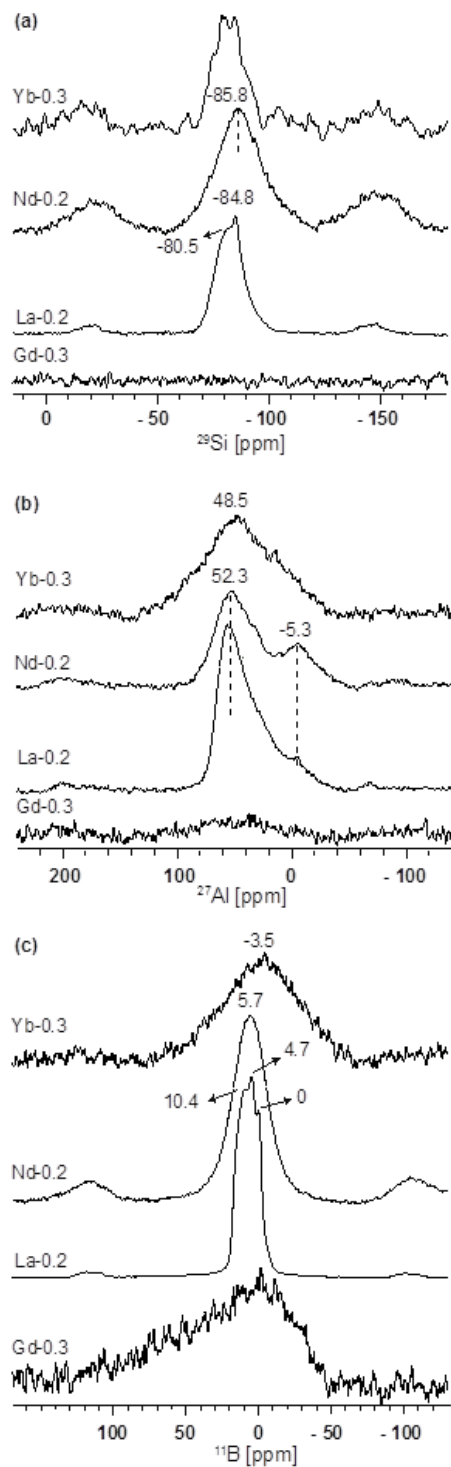

**Fig. S2** MAS NMR spectra of (a)  $^{29}\text{Si}$ , (b)  $^{27}\text{Al}$  and (c)  $^{11}\text{B}$  nuclides for the GCs sintered at 850 °C for 1 h.

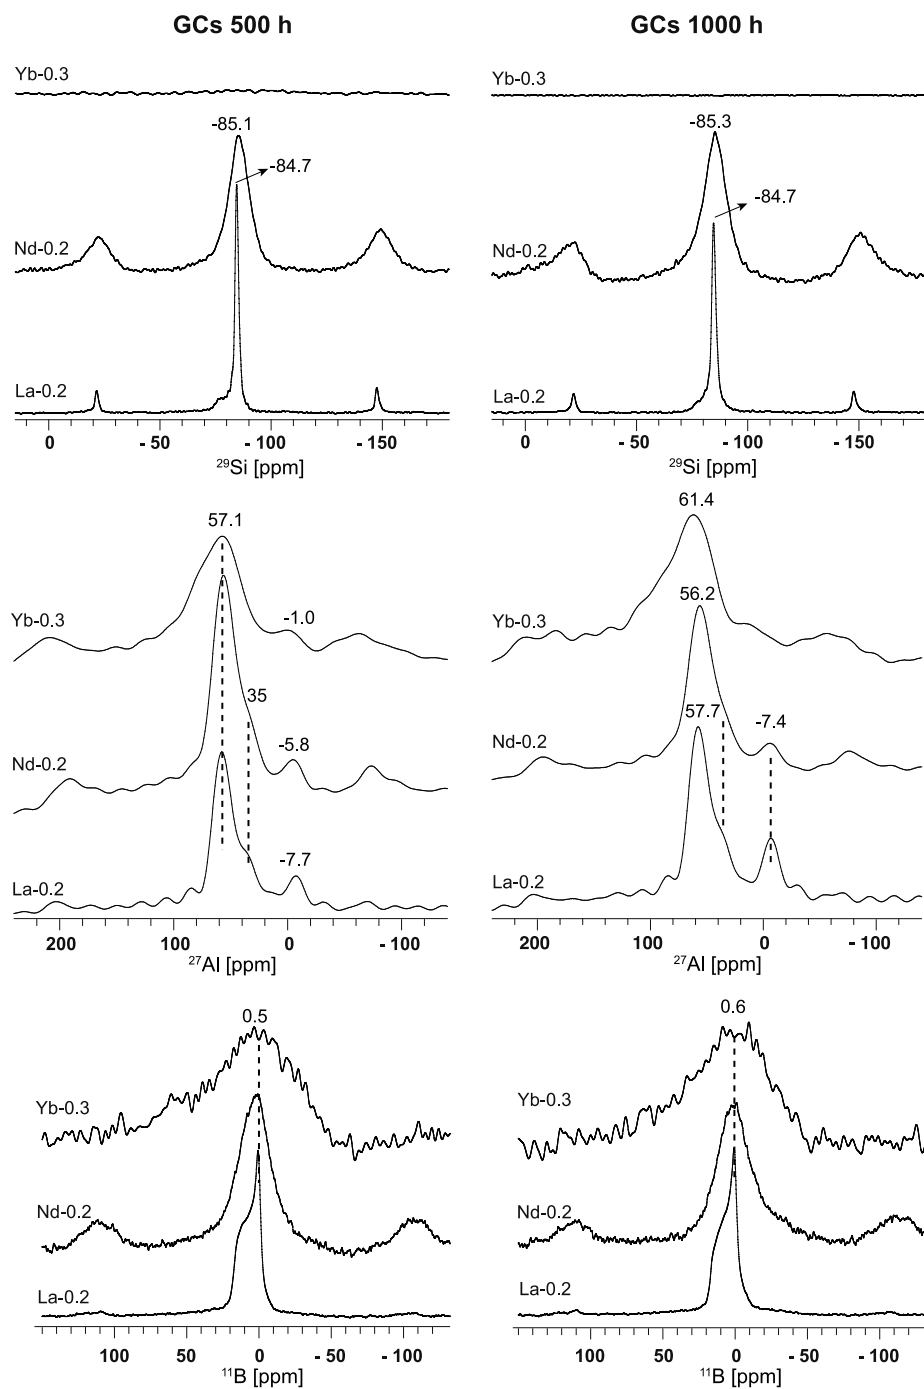

**Fig. S3** MAS NMR spectra of  $^{29}\text{Si}$ ,  $^{27}\text{Al}$  and  $^{11}\text{B}$  nuclides of the GCs heat treated at 850 °C for 500 h and 1000 h.

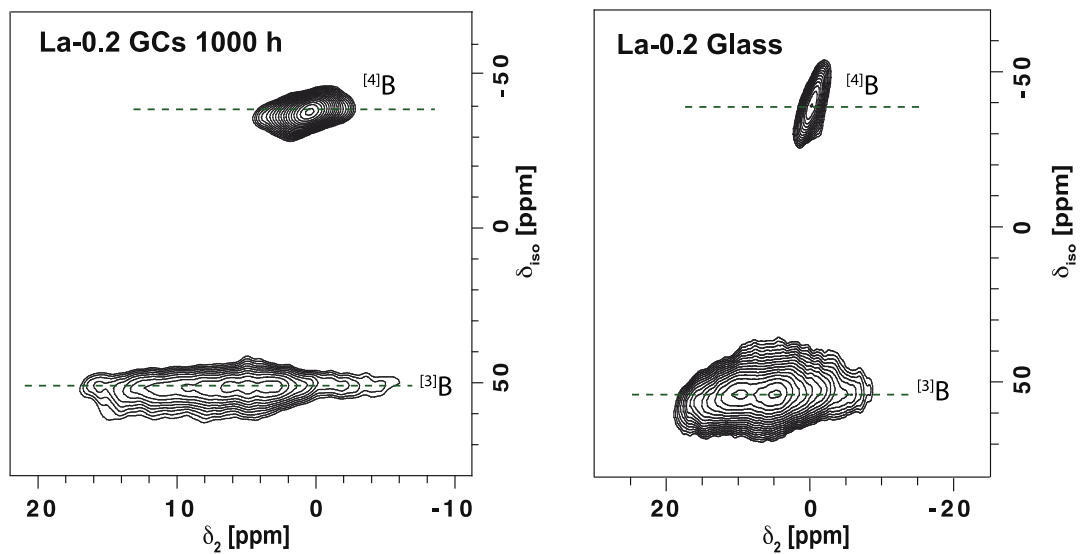

**Fig. S4**  $^{11}\text{B}$  3QMAS spectra of the GC heat treated at 850 °C for 1000 h (left) and the glass powder (right) corresponding to the La-0.2 sample.

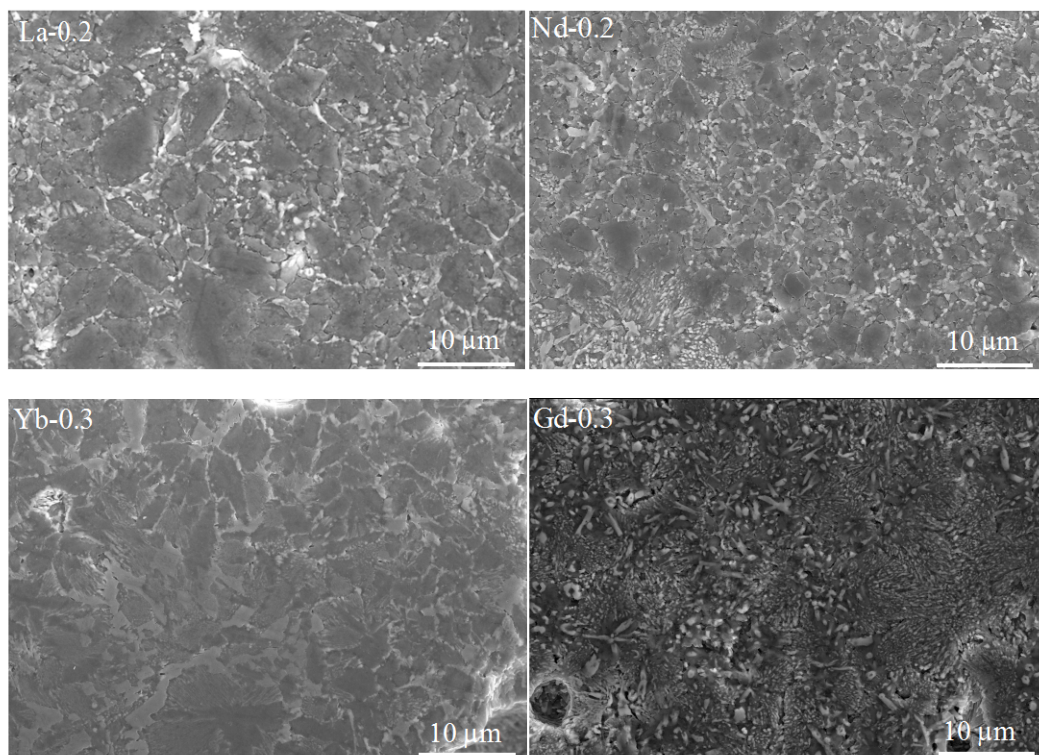

**Fig S5:** SEM microstructures of glass-powder compacts heat treated at 850 °C for 1000 h.

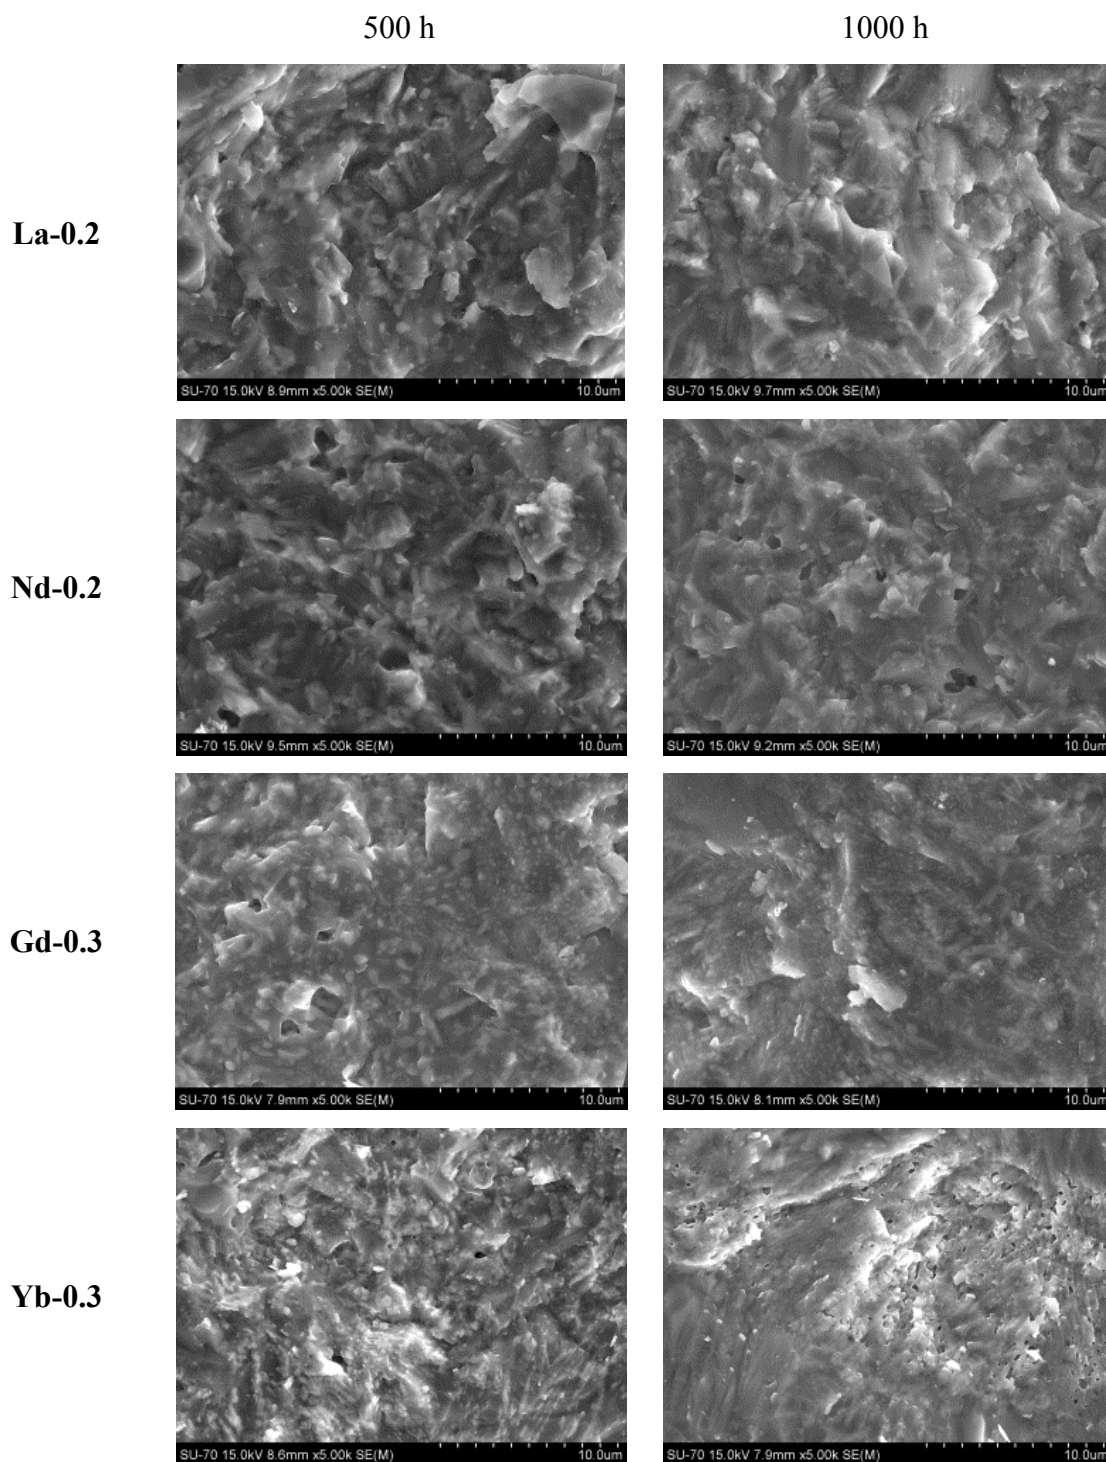

**Fig S6:** Fractured surfaces of glass-powder compacts heat treated at 850 °C for 500 h and 1000 h after the 3 point bending strength measurement.
